# Supplementary material for: Broadband optical limiting response of a graphene–PbS nanohybrid
Source: Royal Society of Chemistry journal article supplement (doi:10.1039/c5nr01088h), 2015-01-01
Supplement: c5nr01088h1.pdf [file c5nr01088h1.pdf]

## Electronic Supplementary Information

### Broadband Optical Limiting Response of Graphene-PbS Nanohybrid

Min Zhao<sup>a</sup>, Rui Peng<sup>a</sup>, Qi Zheng<sup>a</sup>, Qiang Wang<sup>a\*</sup>, Meng-Jie Chang<sup>a</sup>, Yu Liu<sup>a</sup>, Ying-Lin Song<sup>b,c\*</sup> and Hao-Li Zhang<sup>a\*</sup>

<sup>a</sup> State Key Laboratory of Applied Organic Chemistry, College of Chemistry and Chemical Engineering, Key Laboratory of Special Function Materials and Structure Design (MOE), Lanzhou University, Lanzhou 730000, P. R. China.

E-mail: haoli.zhang@lzu.edu.cn; qiangwang@lzu.edu.cn;

<sup>b</sup> School of Physical Science and Technology, Soochow University, Suzhou 215006, P. R. China.

<sup>c</sup> Department of Physics, Harbin Institute of Technology, Harbin 150001, P. R. China.

E-mail: ylsong@hit.edu.cn

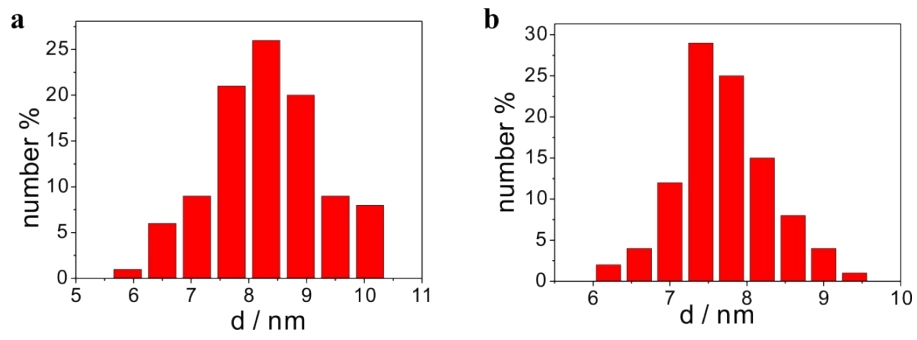

**Figure S1.** The size distribution diagrams of (a) PbS quantum dots grown in solution and (b) PbS QDs grown on rGO.

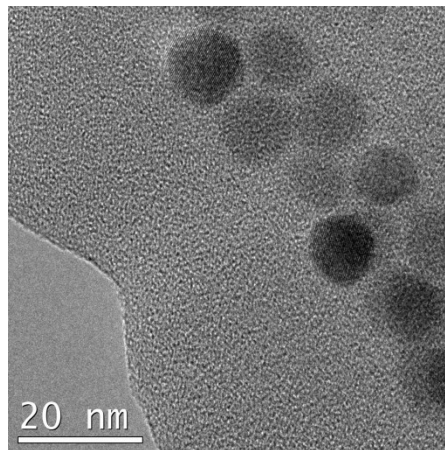

**Figure S2.** HRTEM image of rGO-PbS nanohybrid near the rGO edge.

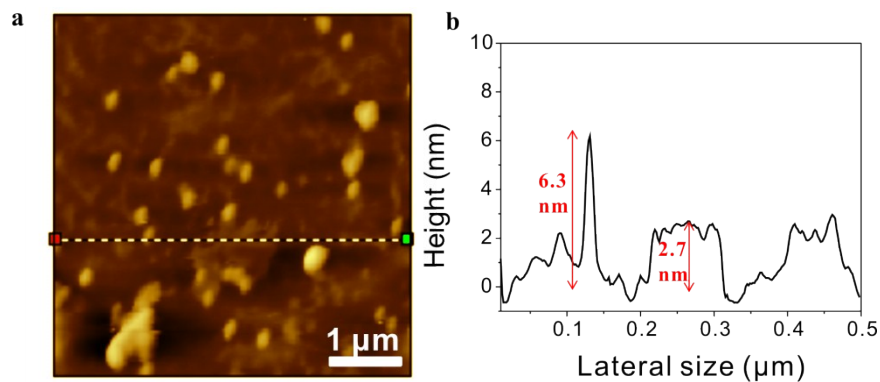

**Figure S3.** (a) AFM images and (b) height profiles of rGO-PbS nanohybrid.

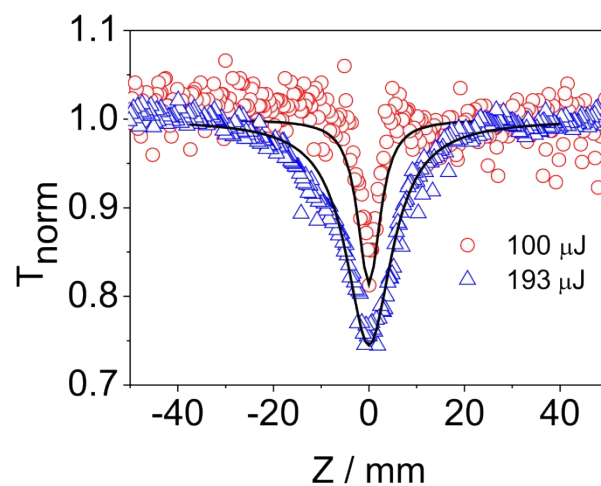

**Figure S4.** Open aperture Z-scan data (symbols) and theoretically fitted curves (solid curves) for a neat film of rGO-PbS in poly(methyl methacrylate) irradiated by 4 ns pulses at 1064 nm at different input laser power. The linear transmittance of the sample given by the  $F_{out}/F_{in}$  ratio in the limit of zero fluence is 0.85.
